# Supplementary material for: A novel approach for monitoring extracellular acidification rates: based on bead injection spectrophotometry and the lab-on-valve systemElectronic supplementary information (ESI) available: Derivation of eqn. (4). See http://www.rsc.org/suppdata/an/b3/b315007k/
Source: Royal Society of Chemistry journal article supplement (doi:10.1039/b315007k), 2004-01-01
Supplement: b315007k.doc [file b315007k.doc]

Appendix

Henderson Hasselbalch equation:

pH = pK + log {[A-]-(nH+/V)}/{[HA]+ (nH+/V)}

-log {[A-]-(nH+/V)}/{[HA]+ (nH+/V)} = pK – pH

-{[A-]-(nH+/V)}/{[HA]+ (nH+/V)} = 10pK-pH

-[A-]-(nH+/V) = 10pK-pH ∙ {[HA]+ (nH+/V)}

-[A-]-(nH+/V) = 10pK-pH ∙ [HA]+ 10pK-pH ∙ (nH+/V)

-10pK-pH ∙ (nH+/V) -(nH+/V) = (10pK-pH ∙ [HA]) + [A-]

Atot=[HA]+[A-]

[HA]=Atot-[A-]

-(nH+/V) ∙ (10pK-pH+1) = (10pK-pH ∙ (Atot-[A-])) + [A-]

-(nH+/V) = {(10pK-pH ∙Atot) - (10pK-pH ∙[A-]) + [A-])} / 1+10pK-pH

-(nH+/V) = {Atot∙10pK-pH / (1+10pK-pH)} – {10pK-pH ∙[A-] + [A-] / (1+10pK-pH)}

-(nH+/V) = {Atot∙(10pK-pH) / 1+10pK-pH} – {[A-]∙(10pK-pH + 1) / (1+10pK-pH)}

-(nH+/V) = {Atot∙(10pK-pH) / 1+10pK-pH} – [A-]

First derivation with respect to dpH

-d(nH+/V)/dpH = ln (10) ∙ Atot ∙ (10pK-pH) / (1+10pK-pH)2
